# Supplementary material for: Paired associative stimulation improves synaptic plasticity and functional outcomes after cerebral ischemia
Source: PubMed Central journal article supplement — Neural Regen Res. 2019 Nov;14(11):1968–76. doi: 10.4103/1673-5374.259618 (PMC6676880; doi:10.4103/1673-5374.259618), 2019-11
Supplement: NRR-14-1968_Suppl1.pdf [file NRR-14-1968_Suppl1.pdf]

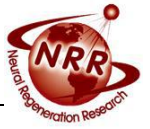

## OPEN PEER REVIEW REPORT 1

**Name of journal:** Neural Regeneration Research

**Manuscript NO:** NRR-D-18-00895

**Title:** Paired associative stimulation can improve synaptic plasticity and functional outcomes after cerebral ischemia

**Reviewer's Name:** Giovanni Casini

**Reviewer's country:** Italy

**Date sent for review:** 2019-01-05

**Date reviewed:** 2019-01-17

**Review time:** 12 days

### COMMENTS TO AUTHORS

The paper describes structural and functional recovery after cerebral ischemia in rats induced by paired associative stimulation. The data are presented in a clear and concise way and the results are adequate to support the conclusions.

I have only a minor comment. It is about figure 3A: although the standard deviations are very small, differences between the three values are very hard to detect. In particular, Sham and PAS values appear almost identical. Are you sure of the statistics?
